# Supplementary material for: Multiplex Flow Cytometry Barcoding and Antibody Arrays Identify Surface Antigen Profiles of Primary and Metastatic Colon Cancer Cell Lines
Source: PLoS One. 2013 Jan 7;8(1):e53015. doi: 10.1371/journal.pone.0053015 (PMC3538639; doi:10.1371/journal.pone.0053015)
Supplement: Table S3 — Complete HCT116 profiling results. (XLSX) [file pone.0053015.s010.xlsx]

## Sheet: BDlyoplate Analysis Version1
Supplemental Table 3. Complete HCT116 profiling results									Critical Range							NUMBERS														SPECIFICITIES								SCALE					normalized		normalized		Critical Range
Specificity	Clone	% pos	Mean	%+Mean	Median	5th %ile	95th %ile		greater than																													1		Specificity	% pos		mean		mean of +pop		Digitized
A1 - Buffer		0.16	698.71	46634.1	575.12	198.64	1251.12		5			Plate 1	mean												Plate 1	mean												2		A1 - Buffer	0.16		0.963911		64.3344		0
A2 - CD1a	HI149	0.03	578.34	78278.7	499.2	194.43	1106.56					698.71	578.34	658.05	625.53	630.77	636.8	1148.53	934.32	890.21	715.77	583.49	668.28		698.71	578.34	658.05	625.53	630.77	636.8	1148.53	934.32	890.21	715.77	583.49	668.28		3		A2 - CD1a	0.03		0.797853		107.99		0
A3 - CD1b	M-T101	0.25	658.05	4436.99	589.16	217.31	1298.02					681.71	12657.6	1093.38	586.11	574.66	557.79	599.3	854.12	1529.19	625.82	649.75	630.62		681.71	12657.6	1093.38	586.11	574.66	557.79	599.3	854.12	1529.19	625.82	649.75	630.62		4		A3 - CD1b	0.25		0.907818		6.12108		0
A4 - CD1d	CD1d42	0.13	625.53	2895.1	568.36	209.04	1223.35		but less than			639.6	675.17	1262.6	643.12	600.37	3853.85	691.73	850.71	538.94	640.04	6243.75	663.23		639.6	675.17	1262.6	643.12	600.37	3853.85	691.73	850.71	538.94	640.04	6243.75	663.23		5		A4 - CD1d	0.13		0.862955		3.99396		0
A5 - CD2	RPA-2.10	0.3	630.77	3726.84	572.52	215.28	1312.64		100			612.83	587.77	1257.17	604.45	601.62	658.14	659.3	639.8	639.49	4308.67	701.79	617.86		612.83	587.77	1257.17	604.45	601.62	658.14	659.3	639.8	639.49	4308.67	701.79	617.86		6		A5 - CD2	0.3		0.870184		5.14139		0
A6 - CD3	HIT3a	0.38	636.8	2659.19	580.84	201.71	1274.05					1244.84	610.61	1154.02	49795.2	601.79	716.75	623.53	499.19	21766.9	12075.1	585.21	594.02		1244.84	610.61	1154.02	49795.2	601.79	716.75	623.53	499.19	21766.9	12075.1	585.21	594.02		7		A6 - CD3	0.38		0.89747		3.74771		0
A7 - CD4	RPA-T4	8.37	1148.53	5327.21	713.44	241.23	3892.25					16580.6	34447.2	639.38	6269.13	610.49	583.71	483.42	3236.91	29652.2	762.06	23677.5	17994		16580.6	34447.2	639.38	6269.13	610.49	583.71	483.42	3236.91	29652.2	762.06	23677.5	17994		8		A7 - CD4	8.37		1.58446		7.34919		1
A8 - CD4v4	L120	6.27	934.32	4279.47	619.84	238.16	2912.47					49706.3	657.99	602.49	641.31	585.37	13663.5	436.66	1290.4	583.67	587.57	614.8	649.62		49706.3	657.99	602.49	641.31	585.37	13663.5	436.66	1290.4	583.67	587.57	614.8	649.62		9		A8 - CD4v4	6.27		1.28895		5.90378		1
A9 - CD5	L17F12	0.44	890.21	29822	624	243.31	1382.21					29071.4	640.01	13827.2	596.94	669.96	684.26	644.02	618.13	43800.6	633.49	569.19	570.76		29071.4	640.01	13827.2	596.94	669.96	684.26	644.02	618.13	43800.6	633.49	569.19	570.76		10		A9 - CD5	0.44		1.25461		42.0294		0
A10 - CD6	M-T605	0.65	715.77	16001.4	564.72	213.2	1283.36																															11		A10 - CD6	0.65		0.987446		22.0749		0
A11 - CD7	M-T701	0.13	583.49	3436.94	523.12	202.7	1148.16																															12		A11 - CD7	0.13		0.804958		4.74146		0
A12 - CD8a	SK1	0.1	668.28	3090.53	599.04	222.51	1367.6					Plate 2	mean												Plate 2	mean												13		A12 - CD8a	0.1		0.921931		4.26356		0
B1 - CD8b	2ST8.5H7	0.47	681.71	2708.78	610.48	225.68	1378.21					899.49	833.32	682.72	743	656.97	653.63	830.85	619.26	608.5	4217.8	3286.58	26115.8		899.49	833.32	682.72	743	656.97	653.63	830.85	619.26	608.5	4217.8	3286.58	26115.8		14		B1 - CD8b	0.47		0.960764		3.8176		0
B2 - CD9	M-L13	79.3	12657.6	15529.5	5700.24	1202.08	47885.8					1527.68	721.36	1057.32	1076.91	654.15	631.32	622.77	1460.48	826.71	3769.38	1759.49	580.13		1527.68	721.36	1057.32	1076.91	654.15	631.32	622.77	1460.48	826.71	3769.38	1759.49	580.13		15		B2 - CD9	79.3		17.462		21.4239		1
B3 - CD10	HI10a	10.17	1093.38	5131	616.72	249.55	4117					828.66	738.13	619.26	668.25	2205.13	840.3	869.98	611.03	602.36	575.04	606.16	1000.87		828.66	738.13	619.26	668.25	2205.13	840.3	869.98	611.03	602.36	575.04	606.16	1000.87		16		B3 - CD10	10.17		1.54095		7.23134		1
B4 - CD11a	G43-25B	0.25	586.11	2298.05	537.68	185.07	1161.73					703.7	694.87	1021.12	1029.06	662.87	638.1	738.27	2148.35	587.25	601.59	645.25	33562.9		703.7	694.87	1021.12	1029.06	662.87	638.1	738.27	2148.35	587.25	601.59	645.25	33562.9		17		B4 - CD11a	0.25		0.826031		3.23874		0
B5 - CD11b	D12	0.17	574.66	3978.52	524.68	185.07	1118.26					657.67	11699.3	82522	667.39	11069.7	611.88	697.85	577.46	839.56	599.41	524.21	580.57		657.67	11699.3	82522	667.39	11069.7	611.88	697.85	577.46	839.56	599.41	524.21	580.57		18		B5 - CD11b	0.17		0.809894		5.6071		0
B6 - CD11c	B-ly6	0.09	557.79	8679.84	499.2	176.75	1128.71					597.51	15341.5	631.37	14485.5	3181.2	625.4	646.13	607.55	579.87	625.99	569.73	588.67		597.51	15341.5	631.37	14485.5	3181.2	625.4	646.13	607.55	579.87	625.99	569.73	588.67		19		B6 - CD11c	0.09		0.769503		11.9743		0
B7 - CD13	WM15	0.09	599.3	2826.72	534.04	204.83	1181.39					682.62	643.59	681.74	667.48	666.34	731.12	630.12	578.55	1516.37	1141.65	578.96	1238.84		682.62	643.59	681.74	667.48	666.34	731.12	630.12	578.55	1516.37	1141.65	578.96	1238.84		20		B7 - CD13	0.09		0.826769		3.89962		0
B8 - CD14	M5E2	0.26	854.12	88831.1	580.32	226.72	1251.17					675.68	653.26	656.16	765.52	839.74	626.33	598.89	1588	582.74	1165.91	758.68	596.81		675.68	653.26	656.16	765.52	839.74	626.33	598.89	1588	582.74	1165.91	758.68	596.81				B8 - CD14	0.26		1.20375		125.194		0
B9 - CD15	HI98	5.59	1529.19	17236.7	551.2	209.61	3464.55																																	B9 - CD15	5.59		2.24561		25.312		1
B10 - CD15s	CSLEX1	0.09	625.82	3895.84	574.6	231.87	1176.29																																	B10 - CD15s	0.09		0.919013		5.72102		0
B11 - CD16	3G8	0.09	649.75	2685.28	595.92	233.95	1254.45					Plate 3	mean												Plate 3	mean														B11 - CD16	0.09		0.896368		3.7045		0
B12 - CD18	6.7	0.09	630.62	2799.68	574.08	229.79	1239.89					588.3	573.88	514.1	520.7	564.89	602.03	10241.9	580.82	587.63	609.35	640.72	611.38		588.3	573.88	514.1	520.7	564.89	602.03	10241.9	580.82	587.63	609.35	640.72	611.38				B12 - CD18	0.09		0.869977		3.86232		0
C1 - CD19	HIB19	0.17	639.6	2784.6	583.44	223.6	1234.64					605.2	639.65	5322.15	588.77	13122.3	566.91	586.49	1124.99	608.17	16980.8	719.73	641.28		605.2	639.65	5322.15	588.77	13122.3	566.91	586.49	1124.99	608.17	16980.8	719.73	641.28				C1 - CD19	0.17		0.882365		3.84152		0
C2 - CD20	2H7	1.8	675.17	2169.39	605.28	229.79	1350.02					962.53	36080.4	13655.8	542.32	628.56	557.4	568.34	613.92	11343.1	909.37	1788.64	83604.9		962.53	36080.4	13655.8	542.32	628.56	557.4	568.34	613.92	11343.1	909.37	1788.64	83604.9				C2 - CD20	1.8		1.19425		3.83725		0
C3 - CD21	B-ly4	8.22	1262.6	3435.54	1028.56	371.23	2913.98					50284.6	45830.6	638.31	622.59										50284.6	45830.6	638.31	622.59	0	0	0	0	0	0	0	0				C3 - CD21	8.22		1.74183		4.73953		1
C4 - CD22	HIB22	0.26	643.12	3849.39	574.6	209.98	1288.61					680.97	724.87	709.55	565.35	610.27									680.97	724.87	709.55	565.35	610.27	0	0	0	0	0	0	0				C4 - CD22	0.26		0.887221		5.31046		0
C5 - CD23	EBVCS-5	0.08	600.37	2976.48	556.92	187.2	1218					48614.6	18962	611.46	662.23	6215.56	654.53	630.76	616.71	730.09	2778.19	1305.3	689.63		48614.6	18962	611.46	662.23	6215.56	654.53	630.76	616.71	730.09	2778.19	1305.3	689.63				C5 - CD23	0.08		0.828245		4.10623		0
C6 - CD24	ML5	11.17	3853.85	29484.3	604.24	231.92	26808.3					15492.9													15492.9	0	0	0	0	0	0	0	0	0	0	0				C6 - CD24	11.17		5.4314		41.5536		1
C7 - CD25	M-A251	0.26	691.73	3063.49	618.8	249.55	1390.48					649.81	745.78	859.86	643.81										649.81	745.78	859.86	643.81	0	0	0	0	0	0	0	0				C7 - CD25	0.26		0.954281		4.22626		0
C8 - CD26	M-A261	1.88	850.71	4097.27	700.96	318.24	1793.64																																	C8 - CD26	1.88		1.1736		5.65242		0
C9 - CD27	M-T271	0	538.94	0	492.96	197.55	1058.93																																	C9 - CD27	0		0.743499		0		0
C10 - CD28	L293	0.08	640.04	3956.16	582.4	213.98	1266.1					Plate 1	normalized mean												Plate 1	normalized mean														C10 - CD28	0.08		0.882972		5.45775		0
C11 - CD29	HUTS-21	95.99	6243.75	6436.57	5546.32	2231.79	12889.5					0.963911	0.797853	0.907818	0.862955	0.870184	0.89747	1.58446	1.28895	1.25461	0.987446	0.804958	0.921931		0.963911	0.797853	0.907818	0.862955	0.870184	0.89747	1.58446	1.28895	1.25461	0.987446	0.804958	0.921931				C11 - CD29	95.99		8.79959		9.07134		1
C12 - CD30	BerH8	0.25	663.23	2881.84	596.96	236.03	1365.62					0.960764	17.462	1.54095	0.826031	0.809894	0.769503	0.826769	1.20375	2.24561	0.919013	0.896368	0.869977		0.960764	17.462	1.54095	0.826031	0.809894	0.769503	0.826769	1.20375	2.24561	0.919013	0.896368	0.869977				C12 - CD30	0.25		0.914964		3.97566		0
D1 - CD31	WM59	0.09	612.83	4259.84	552.24	202.64	1232.45					0.882365	1.19425	1.74183	0.887221	0.828245	5.4314	0.954281	1.1736	0.743499	0.882972	8.79959	0.914964		0.882365	1.19425	1.74183	0.887221	0.828245	5.4314	0.954281	1.1736	0.743499	0.882972	8.79959	0.914964				D1 - CD31	0.09		0.845434		5.8767		0
D2 - CD32	FL18.26	0.87	587.77	2142.5	539.76	204.88	1138.9					0.845434	1.03966	1.73434	0.833874	0.82997	0.966474	0.909542	0.882641	1.13114	5.94406	0.96816	1.01244		0.845434	1.03966	1.73434	0.833874	0.82997	0.966474	0.909542	0.882641	1.13114	5.94406	0.96816	1.01244				D2 - CD32	0.87		1.03966		3.78969		0
D3 - CD33	HIM3-4	4.13	1257.17	8570.41	879.84	371.28	2303.86					1.71733	0.842372	1.59204	88.0786	0.830204	1.2678	0.860196	0.70353	30.677	16.6584	0.859377	0.819485		1.71733	0.842372	1.59204	88.0786	0.830204	1.2678	0.860196	0.70353	30.677	16.6584	0.859377	0.819485				D3 - CD33	4.13		1.73434		11.8234		0
D4 - CD34	581	0	604.45	0	556.4	198.48	1182.84					22.8739	47.5219	0.882062	8.64863	1.07984	0.805262	0.666906	5.7255	41.7901	1.05131	34.7703	25.3597		22.8739	47.5219	0.882062	8.64863	1.07984	0.805262	0.666906	5.7255	41.7901	1.05131	34.7703	25.3597				D4 - CD34	0		0.833874		0		0
D5 - CD35	E11	0	601.62	0	544.96	202.75	1238.64					70.0533	0.907735	0.83117	0.884724	0.807552	18.8496	0.602398	1.81862	0.857116	0.810587	0.848152	1.06448		70.0533	0.907735	0.83117	0.884724	0.807552	18.8496	0.602398	1.81862	0.857116	0.810587	0.848152	1.06448				D5 - CD35	0		0.82997		0		0
D6 - CD36	CB38 (NL07)	0.43	658.14	4109.46	591.76	216.27	1286.48					40.9716	1.13206	19.0754	0.841294	0.983832	1.00483	0.888463	0.852746	60.4254	0.873936	0.78523	1.00957		40.9716	1.13206	19.0754	0.841294	0.983832	1.00483	0.888463	0.852746	60.4254	0.873936	0.78523	1.00957				D6 - CD36	0.43		0.966474		6.03472		0
D7 - CD37	M-B371	0.18	659.3	3461.12	607.36	235.92	1281.44																																	D7 - CD37	0.18		0.909542		4.77481		0
D8 - CD38	HIT2	0.18	639.8	31834.9	548.08	207.9	1160.9																																	D8 - CD38	0.18		0.882641		43.9181		0
D9 - CD39	TU66	1.13	639.49	1967.92	596.96	217.26	1240.51					Plate2	normalized mean												Plate2	normalized mean														D9 - CD39	1.13		1.13114		3.48089		0
D10 - CD40	5C3	83.07	4308.67	4804.06	3921.84	1725.15	8230.61					1.2409	1.14961	0.941852	1.02501	0.906328	0.90172	1.14621	1.09536	0.839461	5.8187	4.53403	36.0283		1.2409	1.14961	0.941852	1.02501	0.906328	0.90172	1.14621	1.09536	0.839461	5.8187	4.53403	36.0283				D10 - CD40	83.07		5.94406		6.62748		1
D11 - CD41a	HIP8	0.84	701.79	5726.14	590.72	257.76	1370.77					2.15303	1.05931	1.45863	1.51774	0.902438	0.870942	0.859147	2.01482	1.14049	5.31235	2.42732	0.800323		2.15303	1.05931	1.45863	1.51774	0.902438	0.870942	0.859147	2.01482	1.14049	5.31235	2.42732	0.800323				D11 - CD41a	0.84		0.96816		7.89954		0
D12 - CD41b	HIP2	0.17	617.86	4233.32	556.4	226.67	1222.21					1.14318	1.08394	0.854305	0.921889	3.0421	1.15924	1.20019	0.842951	0.83099	0.793301	0.836233	1.38076		1.14318	1.08394	0.854305	0.921889	3.0421	1.15924	1.20019	0.842951	0.83099	0.793301	0.836233	1.38076				D12 - CD41b	0.17		1.01244		6.9368		0
E1 - CD42a	ALMA.16	4.86	1244.84	3486.72	1091.48	474.24	2535.68					0.970795	0.958613	1.40869	1.41965	0.914467	0.880296	1.01849	2.96377	0.827637	0.847847	0.89016	46.302		0.970795	0.958613	1.40869	1.41965	0.914467	0.880296	1.01849	2.96377	0.827637	0.847847	0.89016	46.302				E1 - CD42a	4.86		1.71733		4.81013		0
E2 - CD42b	HIP1	0	610.61	0	562.12	194.38	1163.97					0.907294	16.1398	113.844	0.920703	15.2713	0.862349	0.962724	0.796639	1.23289	1.06025	0.723178	0.80093		0.907294	16.1398	113.844	0.920703	15.2713	0.862349	0.962724	0.796639	1.23289	1.06025	0.723178	0.80093				E2 - CD42b	0		0.842372		0		0
E3 - CD43	1G10	10.03	1154.02	5900.6	588.64	239.2	5155.44					0.8243	21.6214	0.871011	19.9836	4.4834	0.862775	0.891374	0.83815	0.799964	1.10726	0.785975	0.829639		0.8243	21.6214	0.871011	19.9836	4.4834	0.862775	0.891374	0.83815	0.799964	1.10726	0.785975	0.829639				E3 - CD43	10.03		1.59204		8.14022		1
E4 - CD44	G44-26	99.6	49795.2	48946.1	42489.2	16719.6	108715					1.20743	0.90704	0.9405	0.98019	0.919254	1.29322	0.869287	1.02335	2.09192	1.57497	0.798709	1.70905		1.20743	0.90704	0.9405	0.98019	0.919254	1.29322	0.869287	1.02335	2.09192	1.57497	0.798709	1.70905				E4 - CD44	99.6		88.0786		86.5765		1
E5 - CD45	HI30	0.25	601.79	2928.29	539.76	215.18	1148.68					0.93214	0.90121	1.16063	1.35406	1.18348	1.02632	0.826203	2.19074	0.803923	1.60844	1.34197	0.823334		0.93214	0.90121	1.16063	1.35406	1.18348	1.02632	0.826203	2.19074	0.803923	1.60844	1.34197	0.823334				E5 - CD45	0.25		0.830204		4.03975		0
E6 - CD45RA	HI100	2.37	716.75	3521.4	627.12	224.64	1330.26																																	E6 - CD45RA	2.37		1.2678		6.22871		0
E7 - CD45RB	MT4	0.17	623.53	2761.72	561.6	224.59	1207.49																																	E7 - CD45RB	0.17		0.860196		3.80995		0
E8 - CD45RO	UCHL1	0.17	499.19	2335.84	446.16	159.12	986.02					Plate 3	normalized mean												Plate 3	normalized mean														E8 - CD45RO	0.17		0.70353		3.292		0
E9 - CD46	E4.3	99.39	21766.9	21893.1	14822.1	5312.63	70016.4					0.811594	0.791701	0.709231	0.718336	0.779298	0.830535	14.1293	0.801275	0.810669	0.840633	0.88391	0.843434		0.811594	0.791701	0.709231	0.718336	0.779298	0.830535	14.1293	0.801275	0.810669	0.840633	0.88391	0.843434				E9 - CD46	99.39		30.677		30.855		1
E10 - CD47	B6H12	99.75	12075.1	12101.3	10864.9	5097.56	23188.5					0.834908	1.13142	7.34221	0.864605	19.27	0.782085	0.809097	1.65204	0.839006	30.0359	0.992909	0.884683		0.834908	1.13142	7.34221	0.864605	19.27	0.782085	0.809097	1.65204	0.839006	30.0359	0.992909	0.884683				E10 - CD47	99.75		16.6584		16.6944		1
E11 - CD48	TU145	0.09	585.21	5099.12	531.96	212.06	1132.61					1.32787	49.775	24.1545	0.764315	0.885857	0.785568	0.784058	0.865224	15.9864	1.25453	2.62661	136.997		1.32787	49.775	24.1545	0.764315	0.885857	0.785568	0.784058	0.865224	15.9864	1.25453	2.62661	136.997				E11 - CD48	0.09		0.859377		7.48802		0
E12 - CD49a	SR84	1.98	594.02	4745.97	423.28	168.48	1535.56					73.8426	67.3019	0.880585	1.10125										73.8426	67.3019	0.880585	1.10125	0	0	0	0	0	0	0	0				E12 - CD49a	1.98		0.819485		6.54734		0
F1 - CD49b	AK-7	99.66	16580.6	16629	13383.2	5686.25	32120.4					1	1	1	1	1									1	1	1	1	1	0	0	0	0	0	0	0				F1 - CD49b	99.66		22.8739		22.9406		1
F2 - CD49c	C3 II.1	99.92	34447.2	34473.5	29691	12299.9	70891.8					56.5378	29.4528	0.949752	1.02861	8.33431	0.761205	0.733561	0.717221	0.84908	3.23098	2.00874	0.802026		56.5378	29.4528	0.949752	1.02861	8.33431	0.761205	0.733561	0.717221	0.84908	3.23098	2.00874	0.802026				F2 - CD49c	99.92		47.5219		47.5582		1
F3 - CD49d	9F10	0.25	639.38	12532.4	551.2	194.43	1246.02					23.8423													23.8423	0	0	0	0	0	0	0	0	0	0	0				F3 - CD49d	0.25		0.882062		17.2891		0
F4 - CD49e	VC5	95.64	6269.13	6462.2	5351.32	2651.84	11500.9					1	1	1	1										1	1	1	1	0	0	0	0	0	0	0	0				F4 - CD49e	95.64		8.64863		8.91498		1
F5 - CD50	TU41	0.74	610.49	2020.26	561.6	217.31	1202.24																																	F5 - CD50	0.74		1.07984		3.57347		0
F6 - CD51/61	23C6	0.09	583.71	3026.4	534.56	197.5	1139.84																																	F6 - CD51/61	0.09		0.805262		4.17509		0
F7 - CD53	HI29	0	483.42	0	438.88	157.04	997.62					Plate 1	% positive												Plate 1	% positive														F7 - CD53	0		0.666906		0		0
F8 - CD54	LB-2	55.39	3236.91	5169.75	1941.68	325.36	10324.9					0.16	0.03	0.25	0.13	0.3	0.38	8.37	6.27	0.44	0.65	0.13	0.1		0.16	0.03	0.25	0.13	0.3	0.38	8.37	6.27	0.44	0.65	0.13	0.1				F8 - CD54	55.39		5.7255		9.14434		1
F9 - CD55	IA10	99.83	29652.2	29701.5	26469	12404.3	57017.2					0.47	79.3	10.17	0.25	0.17	0.09	0.09	0.26	5.59	0.09	0.09	0.09		0.47	79.3	10.17	0.25	0.17	0.09	0.09	0.26	5.59	0.09	0.09	0.09				F9 - CD55	99.83		41.7901		41.8596		1
F10 - CD56	B159	1.39	762.06	12249.9	546	212.11	1336.71					0.17	1.8	8.22	0.26	0.08	11.17	0.26	1.88	0	0.08	95.99	0.25		0.17	1.8	8.22	0.26	0.08	11.17	0.26	1.88	0	0.08	95.99	0.25				F10 - CD56	1.39		1.05131		16.8994		0
F11 - CD57	NK-1	0.84	23677.5	21914.5	21630.4	7961.75	45739.9					0.09	0.87	4.13	0	0	0.43	0.18	0.18	1.13	83.07	0.84	0.17		0.09	0.87	4.13	0	0	0.43	0.18	0.18	1.13	83.07	0.84	0.17				F11 - CD57	0.84		34.7703		32.1813		0
F12 - CD58	1C3	99.25	17994	18125.1	16013.9	7794.49	33082.5					4.86	0	10.03	99.6	0.25	2.37	0.17	0.17	99.39	99.75	0.09	1.98		4.86	0	10.03	99.6	0.25	2.37	0.17	0.17	99.39	99.75	0.09	1.98				F12 - CD58	99.25		25.3597		25.5445		1
G1 - CD59	p282 (H19)	99.42	49706.3	49989.5	44082.5	14881.9	103827					99.66	99.92	0.25	95.64	0.74	0.09	0	55.39	99.83	1.39	0.84	99.25		99.66	99.92	0.25	95.64	0.74	0.09	0	55.39	99.83	1.39	0.84	99.25				G1 - CD59	99.42		70.0533		70.4524		1
G2 - CD61	VI-PL2	0.25	657.99	8616.75	581.36	225.47	1263.7					99.42	0.25	0.08	0.08	0.08	99	0.26	14.44	0.17	0.34	0.25	0.34		99.42	0.25	0.08	0.08	0.08	99	0.26	14.44	0.17	0.34	0.25	0.34				G2 - CD61	0.25		0.907735		11.8873		0
G3 - CD62E	68-5H11	0.08	602.49	2971.28	553.28	213.15	1205.62					99.66	0.91	91.59	0.25	0.51	0.92	0.75	0.08	99.36	0.5	0.08	0.74		99.66	0.91	91.59	0.25	0.51	0.92	0.75	0.08	99.36	0.5	0.08	0.74				G3 - CD62E	0.08		0.83117		4.09905		0
G4 - CD62L	Dreg 56	0.08	641.31	4487.6	575.64	227.6	1249.14																																	G4 - CD62L	0.08		0.884724		6.1909		0
G5 - CD62P	AK-4	0.08	585.37	2646.8	531.44	175.66	1182.79					Plate 2	% positive												Plate 2	% positive														G5 - CD62P	0.08		0.807552		3.65141		0
G6 - CD63	H5C6	99	13663.5	13783.5	11697.9	4135.4	28599.4					1.02	0.63	0.09	0.26	0.17	0.62	0.8	0.81	0.18	63.2	56.09	81.19		1.02	0.63	0.09	0.26	0.17	0.62	0.8	0.81	0.18	63.2	56.09	81.19				G6 - CD63	99		18.8496		19.0151		1
G7 - CD64	10.1	0.26	436.66	2818.75	387.92	160.11	841.52					15.68	0.09	1.07	6.98	0.36	0.18	0.36	7.75	0.61	68.31	17.22	0		15.68	0.09	1.07	6.98	0.36	0.18	0.36	7.75	0.61	68.31	17.22	0				G7 - CD64	0.26		0.602398		3.88863		0
G8 - CD66(a.c.d.e)	B1.1/CD66	14.44	1290.4	5604.37	553.28	219.39	5551.83					0.35	0.72	0	0.27	26.53	0.72	0.09	0.09	0.46	0	0.27	0.44		0.35	0.72	0	0.27	26.53	0.72	0.09	0.09	0.46	0	0.27	0.44				G8 - CD66(a.c.d.e)	14.44		1.81862		7.89848		1
G9 - CD66b	G10F5	0.17	583.67	2806.44	516.88	207.9	1181.54					0.35	0.35	1.63	0.55	0.09	0.09	0.26	24.49	0.09	0.54	0.18	98.76		0.35	0.35	1.63	0.55	0.09	0.09	0.26	24.49	0.09	0.54	0.18	98.76				G9 - CD66b	0.17		0.857116		4.12124		0
G10 - CD66f	IID10	0.34	587.57	7944.82	523.12	186.06	1087.94					0	91.83	100	0.09	85.71	0.18	0.96	0.18	0.51	0.98	0	0.34		0	91.83	100	0.09	85.71	0.18	0.96	0.18	0.51	0.98	0	0.34				G10 - CD66f	0.34		0.810587		10.9603		0
G11 - CD69	FN50	0.25	614.8	5995.6	541.84	228.8	1161.21					0	98.14	0.09	99.82	58.07	0	0.17	0.17	0.09	1.92	0.09	0.43		0	98.14	0.09	99.82	58.07	0	0.17	0.17	0.09	1.92	0.09	0.43				G11 - CD69	0.25		0.848152		8.27128		0
G12 - CD70	Ki-24	0.34	649.62	6339.32	581.36	254.75	1183.73					1.99	0.69	0.44	0.18	0.18	4.56	0.35	0.8	8.02	4.69	0.18	8.2		1.99	0.69	0.44	0.18	0.18	4.56	0.35	0.8	8.02	4.69	0.18	8.2				G12 - CD70	0.34		1.06448		10.3877		0
H1 - CD71	M-A712	99.66	29071.4	29165.5	25006.3	5670.13	65814.5					0.44	0.09	1.96	5.1	0.26	0.59	0.34	11.68	0.26	3	2.61	0.17		0.44	0.09	1.96	5.1	0.26	0.59	0.34	11.68	0.26	3	2.61	0.17				H1 - CD71	99.66		40.9716		41.1042		1
H2 - CD72	J4-117	0.91	640.01	3995.02	561.6	228.75	1239.89																																	H2 - CD72	0.91		1.13206		7.06645		0
H3 - CD73	AD2	91.59	13827.2	14950.6	10741.1	1772.94	36166.8																																	H3 - CD73	91.59		19.0754		20.6252		1
H4 - CD74	M-B741	0.25	596.94	2910.96	536.64	210.08	1192.05					Plate 3	% positive												Plate 3	% positive														H4 - CD74	0.25		0.841294		4.10254		0
H5 - CD75	LN1	0.51	669.96	11963.6	551.2	234	1225.12					0.13	0.53	0.18	0.09	0.09	0.09	95.79	0.17	0.26	0.35	0.51	0		0.13	0.53	0.18	0.09	0.09	0.09	95.79	0.17	0.26	0.35	0.51	0				H5 - CD75	0.51		0.983832		17.5685		0
H6 - CD77	5B5	0.92	684.26	4812.27	567.84	225.63	1406.5					0.45	0.96	93.9	0.26	95.2	0.17	0.08	3.25	0.17	98.43	0.76	0.61		0.45	0.96	93.9	0.26	95.2	0.17	0.08	3.25	0.17	98.43	0.76	0.61				H6 - CD77	0.92		1.00483		7.06679		0
H7 - CD79b	CB3-1	0.75	644.02	6268.66	542.88	213.15	1325.01					0.62	99.56	99.21	0.09	0.69	0.17	0.18	0.53	96.22	1.84	7.78	96.5		0.62	99.56	99.21	0.09	0.69	0.17	0.18	0.53	96.22	1.84	7.78	96.5				H7 - CD79b	0.75		0.888463		8.64798		0
H8 - CD80	L307.4	0.08	618.13	2690.48	563.68	227.71	1225.33					94.66	91.57	0.45	0.95										94.66	91.57	0.45	0.95	0	0	0	0	0	0	0	0				H8 - CD80	0.08		0.852746		3.71167		0
H9 - CD81	JS-81	99.36	43800.6	44076	36751.5	11372.7	98674.6					0	0	0	0	0									0	0	0	0	0	0	0	0	0	0	0	0				H9 - CD81	99.36		60.4254		60.8053		1
H10 - CD83	HB15e	0.5	633.49	3173.04	567.84	208	1264.07					99.47	99.49	0.52	0.44	95.55	0.26	0.09	0.35	1.42	50.61	6.31	0.26		99.47	99.49	0.52	0.44	95.55	0.26	0.09	0.35	1.42	50.61	6.31	0.26				H10 - CD83	0.5		0.873936		4.37739		0
H11 - CD84	2G7	0.08	569.19	4759.04	511.16	189.28	1130.69					81.4													81.4	0	0	0	0	0	0	0	0	0	0	0				H11 - CD84	0.08		0.78523		6.56537		0
H12 - CD85	GHI/75	0.74	570.76	1898.46	516.36	192.4	1107.34					0	0	0	0										0	0	0	0	0	0	0	0	0	0	0	0				H12 - CD85	0.74		1.00957		3.35803		0
A1 - Buffer		1.02	899.49	8055.67	760.76	283.92	1739.19																																	A1 - Buffer	1.02		1.2409		11.1133		0
A2 - CD86	2331 (FUN-1)	0.63	833.32	3521.29	748.8	293.18	1673.62																																	A2 - CD86	0.63		1.14961		4.85782		0
A3 - CD87	VIM5	0.09	682.72	3732.56	625.04	266.08	1390.48					plate 1	mean of positive population												plate 1	mean of positive population														A3 - CD87	0.09		0.941852		5.14928		0
A4 - CD88	D53-1473	0.26	743	2757.73	690.56	264.11	1390.17					46634.1	78278.7	4436.99	2895.1	3726.84	2659.19	5327.21	4279.47	29822	16001.4	3436.94	3090.53		46634.1	78278.7	4436.99	2895.1	3726.84	2659.19	5327.21	4279.47	29822	16001.4	3436.94	3090.53				A4 - CD88	0.26		1.02501		3.80445		0
A5 - CD89	A59	0.17	656.97	2836.6	600.08	206.96	1319.86					2708.78	15529.5	5131	2298.05	3978.52	8679.84	2826.72	88831.1	17236.7	3895.84	2685.28	2799.68		2708.78	15529.5	5131	2298.05	3978.52	8679.84	2826.72	88831.1	17236.7	3895.84	2685.28	2799.68				A5 - CD89	0.17		0.906328		3.91325		0
A6 - CD90	5E10	0.62	653.63	4461.45	580.32	197.6	1266.98					2784.6	2169.39	3435.54	3849.39	2976.48	29484.3	3063.49	4097.27	0	3956.16	6436.57	2881.84		2784.6	2169.39	3435.54	3849.39	2976.48	29484.3	3063.49	4097.27	0	3956.16	6436.57	2881.84				A6 - CD90	0.62		0.90172		6.15483		0
A7 - CD91	A2MR-alpha 2	0.8	830.85	13557.1	671.84	252.67	1487.3					4259.84	2142.5	8570.41	0	0	4109.46	3461.12	31834.9	1967.92	4804.06	5726.14	4233.32		4259.84	2142.5	8570.41	0	0	4109.46	3461.12	31834.9	1967.92	4804.06	5726.14	4233.32				A7 - CD91	0.8		1.14621		18.7028		0
A8 - CDw93	R139	0.81	619.26	1981.55	558.48	234.99	1244.05					3486.72	0	5900.6	48946.1	2928.29	3521.4	2761.72	2335.84	21893.1	12101.3	5099.12	4745.97		3486.72	0	5900.6	48946.1	2928.29	3521.4	2761.72	2335.84	21893.1	12101.3	5099.12	4745.97				A8 - CDw93	0.81		1.09536		3.505		0
A9 - CD94	HP-3D9	0.18	608.5	28865.7	511.68	185.07	1094.08					16629	34473.5	12532.4	6462.2	2020.26	3026.4	0	5169.75	29701.5	12249.9	21914.5	18125.1		16629	34473.5	12532.4	6462.2	2020.26	3026.4	0	5169.75	29701.5	12249.9	21914.5	18125.1				A9 - CD94	0.18		0.839461		39.8219		0
A10 - CD95	DX2	63.2	4217.8	5607.03	3098.16	1204.22	9955.61					49989.5	8616.75	2971.28	4487.6	2646.8	13783.5	2818.75	5604.37	2806.44	7944.82	5995.6	6339.32		49989.5	8616.75	2971.28	4487.6	2646.8	13783.5	2818.75	5604.37	2806.44	7944.82	5995.6	6339.32				A10 - CD95	63.2		5.8187		7.73522		1
A11 - CD97	VIM3b	56.09	3286.58	4551.43	2792.4	924.35	7388.94					29165.5	3995.02	14950.6	2910.96	11963.6	4812.27	6268.66	2690.48	44076	3173.04	4759.04	1898.46		29165.5	3995.02	14950.6	2910.96	11963.6	4812.27	6268.66	2690.48	44076	3173.04	4759.04	1898.46				A11 - CD97	56.09		4.53403		6.27896		1
A12 - CD98	UM7F8	81.19	26115.8	31816.9	10607	1075.1	109482																																	A12 - CD98	81.19		36.0283		43.8933		1
B1 - CD99	TU12	15.68	1527.68	3596.22	1217.84	537.52	3852.73					Plate 2	mean of positive population												Plate 2	mean of positive population														B1 - CD99	15.68		2.15303		5.06831		1
B2 - CD99R	HIT4	0.09	721.36	2967.12	672.88	245.39	1401.35					8055.67	3521.29	3732.56	2757.73	2836.6	4461.45	13557.1	1981.55	28865.7	5607.03	4551.43	31816.9		8055.67	3521.29	3732.56	2757.73	2836.6	4461.45	13557.1	1981.55	28865.7	5607.03	4551.43	31816.9				B2 - CD99R	0.09		1.05931		4.3572		0
B3 - CD100	A8	1.07	1057.32	2969.2	986.96	428.48	2032.37					3596.22	2967.12	2969.2	6521.53	3188.38	3198.52	3397.94	5193.14	4263.85	4899.1	3702.13	0		3596.22	2967.12	2969.2	6521.53	3188.38	3198.52	3397.94	5193.14	4263.85	4899.1	3702.13	0				B3 - CD100	1.07		1.45863		4.09618		0
B4 - CD102	CBR-1C2/2.1	6.98	1076.91	6521.53	652.08	236.91	4300.66					3202.16	3872.18	0	2784.43	3702.43	3022.89	262143	15524.1	5459.17	0	3807.79	55206.9		3202.16	3872.18	0	2784.43	3702.43	3022.89	262143	15524.1	5459.17	0	3807.79	55206.9				B4 - CD102	6.98		1.51774		9.19108		1
B5 - CD103	Ber-ACT8	0.36	654.15	3188.38	589.68	221.47	1337.44					3689.92	3049.8	3098.85	46258.1	2659.28	2710.24	3383.12	4088.78	2260.96	3809.35	4383.6	33961		3689.92	3049.8	3098.85	46258.1	2659.28	2710.24	3383.12	4088.78	2260.96	3809.35	4383.6	33961				B5 - CD103	0.36		0.902438		4.39855		0
B6 - CD105	266	0.18	631.32	3198.52	573.04	208	1245.97					0	12597.5	82522	2588.56	12640.1	2766.4	9648.36	2649.92	53395.9	2496.76	0	3061.24		0	12597.5	82522	2588.56	12640.1	2766.4	9648.36	2649.92	53395.9	2496.76	0	3061.24				B6 - CD105	0.18		0.870942		4.41254		0
B7 - CD106	51-10C9	0.36	622.77	3397.94	551.72	203.68	1225.28					0	15604.3	4122.56	14509.1	4478.07	0	3901.04	8521.76	2740.4	3465.04	4028.96	3213.6		0	15604.3	4122.56	14509.1	4478.07	0	3901.04	8521.76	2740.4	3465.04	4028.96	3213.6				B7 - CD106	0.36		0.859147		4.68765		0
B8 - CD107a	H4A3	7.75	1460.48	5193.14	1138.28	474.24	3021.41					2196.98	2730.78	3307.41	5051.28	4797.52	2302.73	4509.18	2452.2	3272.47	3526.44	6354.4	8637.85		2196.98	2730.78	3307.41	5051.28	4797.52	2302.73	4509.18	2452.2	3272.47	3526.44	6354.4	8637.85				B8 - CD107a	7.75		2.01482		7.16424		1
B9 - CD107b	H4B4	0.61	826.71	4263.85	735.8	313.04	1680.64					12959.4	2611.44	3191.44	2290.98	89241.2	3650.55	3171.22	4404.15	10089.7	3632.93	2609.71	22031.9		12959.4	2611.44	3191.44	2290.98	89241.2	3650.55	3171.22	4404.15	10089.7	3632.93	2609.71	22031.9				B9 - CD107b	0.61		1.14049		5.88223		0
B10 - CD108	KS-2	68.31	3769.38	4899.1	2979.6	787.96	9807.36																																	B10 - CD108	68.31		5.31235		6.90452		1
B11 - CD109	TEA 2/16	17.22	1759.49	3702.13	1484.08	558.48	3911.39					Plate 3	mean of positive population												Plate 3	mean of positive population														B11 - CD109	17.22		2.42732		5.1073		1
B12 - CD112	BAH-1	0	580.13	0	538.72	195.36	1141.09					4043.17	4076.45	3002.48	9306.96	2692.56	2744.56	10611	3651.96	3403.57	6200.22	6017.61	0		4043.17	4076.45	3002.48	9306.96	2692.56	2744.56	10611	3651.96	3403.57	6200.22	6017.61	0				B12 - CD112	0		0.800323		0		0
C1 - CD114	R2.525	0.35	828.66	3202.16	752.96	297.44	1593.59					9310.08	5902.38	5531.09	12016.2	13684.4	2590.64	2665.52	3755.13	3549.52	17239.7	14172.5	5540.53		9310.08	5902.38	5531.09	12016.2	13684.4	2590.64	2665.52	3755.13	3549.52	17239.7	14172.5	5540.53				C1 - CD114	0.35		1.14318		4.41756		0
C2 - CD116	LMM741	0.72	738.13	3872.18	668.72	253.76	1461.1					40324	36233	13525.8	22586.7	2748.07	6235.32	2740.92	2680.95	11755.1	18168.2	15613.4	86588.8		40324	36233	13525.8	22586.7	2748.07	6235.32	2740.92	2680.95	11755.1	18168.2	15613.4	86588.8				C2 - CD116	0.72		1.08394		5.68627		0
C3 - CD117	M5D12	0	619.26	0	568.88	201.66	1216.96					53032	49914.8	9244.56	2324.87										53032	49914.8	9244.56	2324.87	0	0	0	0	0	0	0	0				C3 - CD117	0		0.854305		0		0
C4 - CD118 (LIF rcptr)	YB5.B8	0.27	668.25	2784.43	616.72	213.1	1352.42																		0	0	0	0	0	0	0	0	0	0	0	0				C4 - CD118 (LIF rcptr)	0.27		0.921889		3.84128		0
C5 - CD119	GIR-208	26.53	2205.13	3702.43	1912.56	957.63	4014.66					48867.4	19050.7	2603.12	11306.9	6440.58	2408.29	2256.8	7085	10486.4	4159.61	10918.6	31958.2		48867.4	19050.7	2603.12	11306.9	6440.58	2408.29	2256.8	7085	10486.4	4159.61	10918.6	31958.2				C5 - CD119	26.53		3.0421		5.10772		1
C6 - CD120a	MABTNFR1-A1	0.72	840.3	3022.89	778.96	348.3	1553.86					18776.8													18776.8	0	0	0	0	0	0	0	0	0	0	0				C6 - CD120a	0.72		1.15924		4.17025		0
C7 - CD121a	HIL1R-M1	0.09	869.98	262143	581.36	243.15	1249.04																		0	0	0	0	0	0	0	0	0	0	0	0				C7 - CD121a	0.09		1.20019		361.641		0
C8 - CD121b	MNC2	0.09	611.03	15524.1	555.36	192.4	1171.09																																	C8 - CD121b	0.09		0.842951		21.4164		0
C9 - CD122	Mik-beta 3	0.46	602.36	5459.17	529.36	196.46	1162.1																																	C9 - CD122	0.46		0.83099		7.53124		0
C10 - CD123	9F5	0	575.04	0	529.36	189.23	1157.52					plate 1	Normalized mean of pos. pop.												plate 1	Normalized mean of pos. pop.														C10 - CD123	0		0.793301		0		0
C11- CD124	hIL4R-M57	0.27	606.16	3807.79	543.92	203.74	1173.54					64.3344	107.99	6.12108	3.99396	5.14139	3.74771	7.34919	5.90378	42.0294	22.0749	4.74146	4.26356		64.3344	107.99	6.12108	3.99396	5.14139	3.74771	7.34919	5.90378	42.0294	22.0749	4.74146	4.26356				C11- CD124	0.27		0.836233		5.25307		0
C12 - CD126	M5	0.44	1000.87	55206.9	689.52	287.04	1555.84					3.8176	21.4239	7.23134	3.23874	5.6071	11.9743	3.89962	125.194	25.312	5.72102	3.7045	3.86232		3.8176	21.4239	7.23134	3.23874	5.6071	11.9743	3.89962	125.194	25.312	5.72102	3.7045	3.86232				C12 - CD126	0.44		1.38076		76.161		0
D1 - CD127	hIL-7R-M21	0.35	703.7	3689.92	628.68	253.71	1374.93					3.84152	3.83725	4.73953	5.31046	4.10623	41.5536	4.22626	5.65242	0	5.45775	9.07134	3.97566		3.84152	3.83725	4.73953	5.31046	4.10623	41.5536	4.22626	5.65242	0	5.45775	9.07134	3.97566				D1 - CD127	0.35		0.970795		5.09046		0
D2 - CD128b	6C6	0.35	694.87	3049.8	625.04	235.98	1421.26					5.8767	3.78969	11.8234	0	0	6.03472	4.77481	43.9181	3.48089	6.62748	7.89954	6.9368		5.8767	3.78969	11.8234	0	0	6.03472	4.77481	43.9181	3.48089	6.62748	7.89954	6.9368				D2 - CD128b	0.35		0.958613		4.20738		0
D3 - CD130	AM64	1.63	1021.12	3098.85	928.72	411.79	1979.64					4.81013	0	8.14022	86.5765	4.03975	6.22871	3.80995	3.292	30.855	16.6944	7.48802	6.54734		4.81013	0	8.14022	86.5765	4.03975	6.22871	3.80995	3.292	30.855	16.6944	7.48802	6.54734				D3 - CD130	1.63		1.40869		4.27504		0
D4 - CD134	ACT35	0.55	1029.06	46258.1	734.24	294.22	1575.96					22.9406	47.5582	17.2891	8.91498	3.57347	4.17509	0	9.14434	41.8596	16.8994	32.1813	25.5445		22.9406	47.5582	17.2891	8.91498	3.57347	4.17509	0	9.14434	41.8596	16.8994	32.1813	25.5445				D4 - CD134	0.55		1.41965		63.8157		0
D5 - CD135	4G8	0.09	662.87	2659.28	604.24	239.2	1295.84					70.4524	11.8873	4.09905	6.1909	3.65141	19.0151	3.88863	7.89848	4.12124	10.9603	8.27128	10.3877		70.4524	11.8873	4.09905	6.1909	3.65141	19.0151	3.88863	7.89848	4.12124	10.9603	8.27128	10.3877				D5 - CD135	0.09		0.914467		3.66863		0
D6 - CD137	4B4-1	0.09	638.1	2710.24	577.2	209.92	1300.42					41.1042	7.06645	20.6252	4.10254	17.5685	7.06679	8.64798	3.71167	60.8053	4.37739	6.56537	3.35803		41.1042	7.06645	20.6252	4.10254	17.5685	7.06679	8.64798	3.71167	60.8053	4.37739	6.56537	3.35803				D6 - CD137	0.09		0.880296		3.73893		0
D7 - CD137L	C65-485	0.26	738.27	3383.12	664.56	277.63	1423.08																																	D7 - CD137L	0.26		1.01849		4.66721		0
D8 - CD138	Mi15	24.49	2148.35	4088.78	1771.12	675.64	4794.66					plate 2	Normalized mean of pos. pop.												plate 2	Normalized mean of pos. pop.														D8 - CD138	24.49		2.96377		5.64071		1
D9 - CD140a	alpha R1	0.09	587.25	2260.96	546	194.43	1113.06					11.1133	4.85782	5.14928	3.80445	3.91325	6.15483	18.7028	3.505	39.8219	7.73522	6.27896	43.8933		11.1133	4.85782	5.14928	3.80445	3.91325	6.15483	18.7028	3.505	39.8219	7.73522	6.27896	43.8933				D9 - CD140a	0.09		0.827637		3.18647		0
D10 - CD140b	28D4	0.54	601.59	3809.35	533.52	208.94	1164.28					5.06831	4.3572	4.09618	9.19108	4.39855	4.41254	4.68765	7.16424	5.88223	6.90452	5.1073	0		5.06831	4.3572	4.09618	9.19108	4.39855	4.41254	4.68765	7.16424	5.88223	6.90452	5.1073	0				D10 - CD140b	0.54		0.847847		5.36868		0
D11 - CD141	1A4	0.18	645.25	4383.6	573.04	238.06	1335.57					4.41756	5.68627	0	3.84128	5.10772	4.17025	361.641	21.4164	7.53124	0	5.25307	76.161		4.41756	5.68627	0	3.84128	5.10772	4.17025	361.641	21.4164	7.53124	0	5.25307	76.161				D11 - CD141	0.18		0.89016		6.04743		0
D12 - CD142	HTF-1	98.76	33562.9	33961	23361.5	5078.53	96620.3					5.09046	4.20738	4.27504	63.8157	3.66863	3.73893	4.66721	5.64071	3.18647	5.36868	6.04743	46.8512		5.09046	4.20738	4.27504	63.8157	3.66863	3.73893	4.66721	5.64071	3.18647	5.36868	6.04743	46.8512				D12 - CD142	98.76		46.302		46.8512		1
E1 - CD144	55-7H1	0	657.67	0	598	238.11	1279.3					0	17.379	113.844	3.57107	17.4378	3.89881	13.3105	3.65572	78.4116	4.41631	0	4.22316		0	17.379	113.844	3.57107	17.4378	3.89881	13.3105	3.65572	78.4116	4.41631	0	4.22316				E1 - CD144	0		0.907294		0		0
E2 - CD146	P1H12	91.83	11699.3	12597.5	9053.2	1894.05	27655.1					0	21.9919	5.68731	20.0162	6.31114	0	5.38171	11.7563	3.78054	6.12902	5.55818	4.52907		0	21.9919	5.68731	20.0162	6.31114	0	5.38171	11.7563	3.78054	6.12902	5.55818	4.52907				E2 - CD146	91.83		16.1398		17.379		1
E3 - CD147	HIM6	100	82522	82522	78056.2	36330.8	146950					3.88605	3.84861	4.56276	7.41777	6.61846	4.07311	6.22067	4.33749	4.51456	4.86493	8.76626	11.9164		3.88605	3.84861	4.56276	7.41777	6.61846	4.07311	6.22067	4.33749	4.51456	4.86493	8.76626	11.9164				E3 - CD147	100		113.844		113.844		0
E4 - CD150	A12	0.09	667.39	2588.56	610.48	237.02	1300.52					17.8783	3.60263	5.64507	4.05232	125.772	5.98186	4.37488	6.07578	13.9194	5.01184	4.6161	30.3943		17.8783	3.60263	5.64507	4.05232	125.772	5.98186	4.37488	6.07578	13.9194	5.01184	4.6161	30.3943				E4 - CD150	0.09		0.920703		3.57107		0
E5 - CD151	14A2.H1	85.71	11069.7	12640.1	7652.32	1426.62	32815.8																																	E5 - CD151	85.71		15.2713		17.4378		1
E6 - CD152	BNI3	0.18	611.88	2766.4	553.28	234	1174.58					Plate 3	Normalized mean of pos. pop.												Plate 3	Normalized mean of pos. pop.														E6 - CD152	0.18		0.862349		3.89881		0
E7 - CD153	D2-1173	0.96	697.85	9648.36	563.68	221.16	1218.98					5.57779	5.6237	4.14209	12.8395	3.71454	3.78628	14.6384	5.03809	4.69542	8.55356	8.30164	0		5.57779	5.6237	4.14209	12.8395	3.71454	3.78628	14.6384	5.03809	4.69542	8.55356	8.30164	0				E7 - CD153	0.96		0.962724		13.3105		0
E8 - CD154	TRAP1	0.18	577.46	2649.92	527.8	190.16	1115.92					12.8438	10.4402	7.63046	17.6457	20.0955	3.57394	3.67724	5.51438	4.89677	30.4938	19.5518	7.64348		12.8438	10.4402	7.63046	17.6457	20.0955	3.57394	3.67724	5.51438	4.89677	30.4938	19.5518	7.64348				E8 - CD154	0.18		0.796639		3.65572		0
E9 - CD158a	HP-3E4	0.51	839.56	53395.9	523.12	192.4	1156.64					55.6293	49.9855	23.9246	31.8325	3.87298	8.78771	3.78126	3.77838	16.5669	25.0641	22.9281	141.886		55.6293	49.9855	23.9246	31.8325	3.87298	8.78771	3.78126	3.77838	16.5669	25.0641	22.9281	141.886				E9 - CD158a	0.51		1.23289		78.4116		0
E10 - CD158b	CH-L	0.98	599.41	2496.76	536.64	199.63	1169.01					77.8771	73.2995	12.7534	4.11227										77.8771	73.2995	12.7534	4.11227												E10 - CD158b	0.98		1.06025		4.41631		0
E11 - CD161	DX12	0	524.21	0	482.56	181.95	1036.93																		0	0	0	0	0											E11 - CD161	0		0.723178		0		0
E12 - CD162	KPL-1	0.34	580.57	3061.24	522.08	177.79	1156.79					56.8318	29.5905	4.0433	17.5624	8.63603	2.80079	2.62461	8.23971	12.1955	4.83754	16.8027	37.1667		56.8318	29.5905	4.0433	17.5624	8.63603	2.80079	2.62461	8.23971	12.1955	4.83754	16.8027	37.1667				E12 - CD162	0.34		0.80093		4.22316		0
F1 - CD163	GHI/61	0	597.51	0	552.24	210.08	1161.78					28.8958													28.8958															F1 - CD163	0		0.8243		0		0
F2 - CD164	N6B6	98.14	15341.5	15604.3	12190.4	3459.14	34777.8																		0	0	0	0												F2 - CD164	98.14		21.6214		21.9919		1
F3 - CD165	SN2	0.09	631.37	4122.56	575.12	211.02	1301.25																																	F3 - CD165	0.09		0.871011		5.68731		0
F4 - CD166	3A6	99.82	14485.5	14509.1	12908	6349.04	27750.8																																	F4 - CD166	99.82		19.9836		20.0162		1
F5 - CD171	5G3	58.07	3181.2	4478.07	2416.44	762.01	7621.74					Plate 1	Critical range digital												Plate 1	Critical range digital														F5 - CD171	58.07		4.4834		6.31114		1
F6 - CD172b	B4B6	0	625.4	0	568.88	206.96	1211.76					0	0	0	0	0	0	1	1	0	0	0	0		0	0	0	0	0	0	1	1	0	0	0	0				F6 - CD172b	0		0.862775		0		0
F7 - CD177	MEM-166	0.17	646.13	3901.04	578.24	210.08	1255.54					0	1	1	0	0	0	0	0	1	0	0	0		0	1	1	0	0	0	0	0	1	0	0	0				F7 - CD177	0.17		0.891374		5.38171		0
F8 - CD178	NOK-1	0.17	607.55	8521.76	533.52	212.99	1184.87					0	0	1	0	0	1	0	0	0	0	1	0		0	0	1	0	0	1	0	0	0	0	1	0				F8 - CD178	0.17		0.83815		11.7563		0
F9 - CD180	G28-8	0.09	579.87	2740.4	530.4	197.6	1144.05					0	0	0	0	0	0	0	0	0	1	0	0		0	0	0	0	0	0	0	0	0	1	0	0				F9 - CD180	0.09		0.799964		3.78054		0
F10 - CD181	5A12	1.92	625.99	3465.04	512.2	211.02	1247.12					0	0	1	1	0	0	0	0	1	1	0	0		0	0	1	1	0	0	0	0	1	1	0	0				F10 - CD181	1.92		1.10726		6.12902		0
F11 - CD183	1C6/CXCR3	0.09	569.73	4028.96	508.56	174.56	1149.46					1	1	0	1	0	0	0	1	1	0	0	1		1	1	0	1	0	0	0	1	1	0	0	1				F11 - CD183	0.09		0.785975		5.55818		0
F12 - CD184	12G5	0.43	588.67	3213.6	531.44	180.8	1173.17					1	0	0	0	0	1	0	1	0	0	0	0		1	0	0	0	0	1	0	1	0	0	0	0				F12 - CD184	0.43		0.829639		4.52907		0
G1 - CD193	5E8	1.99	682.62	2196.98	626.08	223.5	1363.49					1	0	1	0	0	0	0	0	1	0	0	0		1	0	1	0	0	0	0	0	1	0	0	0				G1 - CD193	1.99		1.20743		3.88605		0
G2 - CD61	2D7/CCR5	0.69	643.59	2730.78	570.96	211.07	1323.97																																	G2 - CD61	0.69		0.90704		3.84861		0
G3 - CD196	11A9	0.44	681.74	3307.41	612.56	249.55	1366.66					Plate 2	Critical range digital												Plate 2	Critical range digital														G3 - CD196	0.44		0.9405		4.56276		0
G4 - CD197	2H4	0.18	667.48	5051.28	601.12	246.27	1294.02					0	0	0	0	0	0	0	0	0	1	1	1		0	0	0	0	0	0	0	0	0	1	1	1				G4 - CD197	0.18		0.98019		7.41777		0
G5 - CD200	MRC OX-104	0.18	666.34	4797.52	603.2	222.51	1319.81					1	0	0	1	0	0	0	1	0	1	1	0		1	0	0	1	0	0	0	1	0	1	1	0				G5 - CD200	0.18		0.919254		6.61846		0
G6 - CD205	MG38	4.56	731.12	2302.73	602.16	225.68	1658.54					0	0	0	0	1	0	0	0	0	0	0	0		0	0	0	0	1	0	0	0	0	0	0	0				G6 - CD205	4.56		1.29322		4.07311		0
G7 - CD206	19.2	0.35	630.12	4509.18	557.44	197.5	1237.7					0	0	0	0	0	0	0	1	0	0	0	1		0	0	0	0	0	0	0	1	0	0	0	1				G7 - CD206	0.35		0.869287		6.22067		0
G8 - CD209	DCN46	0.8	578.55	2452.2	526.24	205.92	1107.76					0	1	0	0	1	0	0	0	0	0	0	0		0	1	0	0	1	0	0	0	0	0	0	0				G8 - CD209	0.8		1.02335		4.33749		0
G9 - CD220	3B6/IR	8.02	1516.37	3272.47	1357.2	695.71	2871.7					0	1	0	1	1	0	0	0	0	0	0	0		0	1	0	1	1	0	0	0	0	0	0	0				G9 - CD220	8.02		2.09192		4.51456		1
G10 - CD221	3B7	4.69	1141.65	3526.44	944.32	433.42	2472.55					0	0	0	0	0	0	0	0	1	0	0	1		0	0	0	0	0	0	0	0	1	0	0	1				G10 - CD221	4.69		1.57497		4.86493		0
G11 - CD226	DX11	0.18	578.96	6354.4	512.2	202.75	1152.68					0	0	0	1	0	0	0	1	0	0	0	0		0	0	0	1	0	0	0	1	0	0	0	0				G11 - CD226	0.18		0.798709		8.76626		0
G12 - CD227	HMPV	8.2	1238.84	8637.85	527.28	192.4	5179.62																																	G12 - CD227	8.2		1.70905		11.9164		1
H1 - CD229	HLy9.1.25	0.44	675.68	12959.4	578.24	221.47	1230.32																																	H1 - CD229	0.44		0.93214		17.8783		0
H2 - CD231	M3-3D9 (SN1a)	0.09	653.26	2611.44	595.4	229.84	1285.49					Plate 3	Critical range digital												Plate 3	Critical range digital														H2 - CD231	0.09		0.90121		3.60263		0
H3 - CD235a	GA-R2 (HIR2)	1.96	656.16	3191.44	561.6	227.76	1300.1					0	0	0	0	0	0	1	0	0	0	0	0		0	0	0	0	0	0	1	0	0	0	0	0				H3 - CD235a	1.96		1.16063		5.64507		0
H4 - CD243 (p-glycoProtein)	17F9	5.1	765.52	2290.98	656.24	253.71	1692.29					0	0	1	0	1	0	0	0	0	1	0	0		0	0	1	0	1	0	0	0	0	1	0	0				H4 - CD243 (p-glycoProtein)	5.1		1.35406		4.05232		1
H5 - CD244	2-69	0.26	839.74	89241.2	552.76	218.35	1220.18					0	1	1	0	0	0	0	0	1	0	1	1		0	1	1	0	0	0	0	0	1	0	1	1				H5 - CD244	0.26		1.18348		125.772		0
H6 - CD255 (Tweak)	CARL-1	0.59	626.33	3650.55	554.32	205.87	1288.87					1	1	0	0										1	1	0	0	0	0	0	0	0	0	0	0				H6 - CD255 (Tweak)	0.59		1.02632		5.98186		0
H7 - CD268	11C1	0.34	598.89	3171.22	530.4	198.64	1220.02					0	0	0	0	0									0	0	0	0	0	0	0	0	0	0	0	0				H7 - CD268	0.34		0.826203		4.37488		0
H8 - CD271	C40-1457	11.68	1588	4404.15	1243.84	452.24	3484.26					1	1	0	0	1	0	0	0	0	1	1	0		1	1	0	0	1	0	0	0	0	1	1	0				H8 - CD271	11.68		2.19074		6.07578		1
H9 - CD273	MIH18	0.26	582.74	10089.7	502.32	172.59	1129.54					1													1	0	0	0	0	0	0	0	0	0	0	0				H9 - CD273	0.26		0.803923		13.9194		0
H10 - CD274	MIH1	3	1165.91	3632.93	1015.04	477.31	2218.79					0	0	0	0										0	0	0	0	0	0	0	0	0	0	0	0				H10 - CD274	3		1.60844		5.01184		0
H11 - CD275 (B7-H2)	2D3/B7-H2	2.61	758.68	2609.71	656.76	284.91	1486.16																																	H11 - CD275 (B7-H2)	2.61		1.34197		4.6161		0
H12 - CD278	DX29	0.17	596.81	22031.9	513.76	204.72	1104.58																																	H12 - CD278	0.17		0.823334		30.3943		0
A1 - Buffer		0.13	588.3	4043.17	530.4	186.16	1183.62					Plate1	Bimodality Index						log(95%-median)/log(median-5%)						Plate 1	Bimodality Index						log(95%-median)/log(median-5%)								A1 - Buffer	0.13		0.811594		5.57779		0
A2 - CD279	MIH4	0.53	573.88	4076.45	512.2	182	1124.76					1.09869	1.12056	1.10901	1.10204	1.12391	1.10163	1.30968	1.3016	1.11595	1.12198	1.11581	1.1203		1.09869	1.12056	1.10901	1.10204	1.12391	1.10163	1.30968	1.3016	1.11595	1.12198	1.11581	1.1203				A2 - CD279	0.53		0.791701		5.6237		0
A3 - CD282	11G7	0.18	514.1	3002.48	462.8	164.22	1004.9					1.11603	1.26612	1.38179	1.09733	1.09581	1.11582	1.11665	1.10913	1.36743	1.09642	1.10158	1.1129		1.11603	1.26612	1.38179	1.09733	1.09581	1.11582	1.11665	1.10913	1.36743	1.09642	1.10158	1.1129				A3 - CD282	0.18		0.709231		4.14209		0
A4 - CD305(LAIR-1)	DX26	0.09	520.7	9306.96	475.28	184.91	987.17					1.10078	1.11552	1.16241	1.11393	1.09828	1.7186	1.12469	1.1764	1.1143	1.10463	1.09813	1.12838		1.10078	1.11552	1.16241	1.11393	1.09828	1.7186	1.12469	1.1764	1.1143	1.10463	1.09813	1.12838				A4 - CD305(LAIR-1)	0.09		0.718336		12.8395		0
A5- CD309	89106	0.09	564.89	2692.56	512.72	182.94	1171.09					1.11365	1.10006	1.16523	1.09519	1.12109	1.10379	1.10071	1.10097	1.08883	1.08755	1.14658	1.1212		1.11365	1.10006	1.16523	1.09519	1.12109	1.10379	1.10071	1.10097	1.08883	1.08755	1.14658	1.1212				A5- CD309	0.09		0.779298		3.71454		0
A6 - CD314(NKG2D)	1D11	0.09	602.03	2744.56	559.52	201.71	1159.03					1.1323	1.08339	1.43888	1.09293	1.1088	1.09302	1.11177	1.11161	1.19198	1.08768	1.10922	1.26599		1.1323	1.08339	1.43888	1.09293	1.1088	1.09302	1.11177	1.11161	1.19198	1.08768	1.10922	1.26599				A6 - CD314(NKG2D)	0.09		0.830535		3.78628		0
A7 - CD321(F11 Rcptr)	M.AB.F11	95.79	10241.9	10611	8671.52	2811.69	22762.1					1.09942	1.08834	1.11342	1.10421	1.10631	1.10058	1.12131	1.22281	1.08121	1.14836	1.05959	1.08106		1.09942	1.08834	1.11342	1.10421	1.10631	1.10058	1.12131	1.22281	1.08121	1.14836	1.05959	1.08106				A7 - CD321(F11 Rcptr)	95.79		14.1293		14.6384		1
A8 - CDw327	E20-1232	0.17	580.82	3651.96	524.16	191.36	1140.98					1.06963	1.1108	1.11172	1.1128	1.10295	1.09005	1.12687	1.4657	1.13361	1.0887	1.11875	1.10574		1.06963	1.1108	1.11172	1.1128	1.10295	1.09005	1.12687	1.4657	1.13361	1.0887	1.11875	1.10574				A8 - CDw327	0.17		0.801275		5.03809		0
A9 - CDw328	F023-420	0.26	587.63	3403.57	521.56	192.3	1227.93					1.07568	1.12258	1.1145	1.12035	1.13084	1.15361	1.14897	1.11651	1.08795	1.11214	1.1134	1.104		1.07568	1.12258	1.1145	1.12035	1.13084	1.15361	1.14897	1.11651	1.08795	1.11214	1.1134	1.104				A9 - CDw328	0.26		0.810669		4.69542		0
A10 - CDw329	E10-286	0.35	609.35	6200.22	534.56	200.72	1229.44																																	A10 - CDw329	0.35		0.840633		8.55356		0
A11 - CD335(NKP46)	9E2/NKp46	0.51	640.72	6017.61	549.12	198.59	1276.18					Plate2	Bimodality Index						log(95%-median)/log(median-5%)						Plate 2	Bimodality Index						log(95%-median)/log(median-5%)								A11 - CD335(NKP46)	0.51		0.88391		8.30164		0
A12 - CD336	P44-8.1	0	611.38	0	550.68	200.46	1220.08					1.11655	1.11565	1.12871	1.08175	1.10124	1.09829	1.11021	1.12996	1.09992	1.1705	1.11953	1.25531		1.11655	1.11565	1.12871	1.08175	1.10124	1.09829	1.11021	1.12996	1.09992	1.1705	1.11953	1.25531				A12 - CD336	0		0.843434		0		0
B1 - CD337	P30-15	0.45	605.2	9310.08	527.28	184.03	1122.32					1.20759	1.08799	1.09912	1.36051	1.1199	1.10367	1.11282	1.1604	1.133	1.14772	1.14115	1.09627		1.20759	1.08799	1.09912	1.36051	1.1199	1.10367	1.11282	1.1604	1.133	1.14772	1.14115	1.09627				B1 - CD337	0.45		0.834908		12.8438		0
B2 - CD338(ABCG2)	5D3	0.96	639.65	5902.38	551.2	217.31	1178.63					1.10009	1.10731	1.09618	1.10005	1.115	1.09685	1.11679	1.08967	1.11058	1.10524	1.10561	1.12782		1.10009	1.10731	1.09618	1.10005	1.115	1.09685	1.11679	1.08967	1.11058	1.10524	1.10561	1.12782				B2 - CD338(ABCG2)	0.96		1.13142		10.4402		0
B3 - CD340(Her2)	Neu24.7	93.9	5322.15	5531.09	4885.92	2455.34	9419.85					1.11612	1.12008	1.11356	1.10656	1.10831	1.11473	1.11297	1.14506	1.08155	1.1149	1.14148	1.14144		1.11612	1.12008	1.11356	1.10656	1.10831	1.11473	1.11297	1.14506	1.08155	1.1149	1.14148	1.14144				B3 - CD340(Her2)	93.9		7.34221		7.63046		1
B4 - abTCR	T10B9.1A-31	0.26	588.77	12016.2	510.64	172.64	1157.57					1.10843	1.10758	1.04713	1.10366	1.15987	1.11546	1.11116	1.09532	1.11205	1.10814	1.10726	1.10471		1.10843	1.10758	1.04713	1.10366	1.15987	1.11546	1.11116	1.09532	1.11205	1.10814	1.10726	1.10471				B4 - abTCR	0.26		0.864605		17.6457		0
B5 - B2-uGlob	TU99	95.2	13122.3	13684.4	9881.04	2712.63	33851.9					1.09895	1.10474	1.11705	1.09293	1.15466	1.09752	1.10317	1.12289	1.10536	1.15629	1.11215	1.10315		1.09895	1.10474	1.11705	1.09293	1.15466	1.09752	1.10317	1.12289	1.10536	1.15629	1.11215	1.10315				B5 - B2-uGlob	95.2		19.27		20.0955		1
B6 - BLTR-1	203/14F11	0.17	566.91	2590.64	508.56	190.27	1124.92					1.10091	1.12543	1.12403	1.11397	1.10645	1.17396	1.10815	1.10336	1.12755	1.1757	1.12684	1.45261		1.10091	1.12543	1.12403	1.11397	1.10645	1.17396	1.10815	1.10336	1.12755	1.1757	1.12684	1.45261				B6 - BLTR-1	0.17		0.782085		3.57394		0
B7 - CLIP	CerCLIP	0.08	586.49	2665.52	523.12	207.95	1181.49					1.10261	1.10767	1.13664	1.15763	1.11889	1.1274	1.12606	1.15588	1.1109	1.12817	1.13554	1.11303		1.10261	1.10767	1.13664	1.15763	1.11889	1.1274	1.12606	1.15588	1.1109	1.12817	1.13554	1.11303				B7 - CLIP	0.08		0.809097		3.67724		0
B8 - CMRF-44	CMRF44	3.25	1124.99	3755.13	973.96	440.86	2358.25																																	B8 - CMRF-44	3.25		1.65204		5.51438		0
B9 - CMRF-56	CMRF56	0.17	608.17	3549.52	552.76	193.34	1192.46					Plate 3	Bimodality Index						log(95%-median)/log(median-5%)						Plate 3	Bimodality Index						log(95%-median)/log(median-5%)								B9 - CMRF-56	0.17		0.839006		4.89677		0
B10 - EGF-r	EGFR1	98.43	16980.8	17239.7	15365	7072.31	32894.9					1.10966	1.10655	1.10465	1.09997	1.11923	1.08777	1.10113	1.10625	1.13167	1.12616	1.12451	1.11058		1.10966	1.10655	1.10465	1.09997	1.11923	1.08777	1.10113	1.10625	1.13167	1.12616	1.12451	1.11058				B10 - EGF-r	98.43		30.0359		30.4938		1
B11 - Fmlp-r	5F1	0.76	719.73	14172.5	554.32	212.11	1252.37					1.09423	1.10856	1.07997	1.11149	1.13598	1.11468	1.12804	1.15198	1.09797	1.08296	1.12216	1.12332		1.09423	1.10856	1.07997	1.11149	1.13598	1.11468	1.12804	1.15198	1.09797	1.08296	1.12216	1.12332				B11 - Fmlp-r	0.76		0.992909		19.5518		0
B12 - gd TCR	B1	0.61	641.28	5540.53	555.36	210.08	1265.21					1.1451	1.06664	1.12759	1.1164	1.1163	1.1125	1.12762	1.1182	1.0697	1.13606	1.52621	1.06908		1.1451	1.06664	1.12759	1.1164	1.1163	1.1125	1.12762	1.1182	1.0697	1.13606	1.52621	1.06908				B12 - gd TCR	0.61		0.884683		7.64348		0
C1 - Hem. Prog. Cell	BB9	0.62	962.53	40324	625.04	214.19	1608.88					1.11964	1.15683	1.11168	1.11073										1.11964	1.15683	1.11168	1.11073	0	0	0	0	0	0	0	0				C1 - Hem. Prog. Cell	0.62		1.32787		55.6293		0
C2 - HLA-A,B,C	G46-2.6	99.56	36080.4	36233	32310.7	14366.2	66779					1.12957	1.1081	1.10298	1.08951	1.12105									1.12957	1.1081	1.10298	1.08951	1.12105	0	0	0	0	0	0	0				C2 - HLA-A,B,C	99.56		49.775		49.9855		1
C3 - HLA-A2	BB7.2	99.21	13655.8	13525.8	11363.6	4786.08	31557.5					1.09614	1.09825	1.14374	1.11242	1.08365	1.11878	1.11135	1.10768	1.12498	1.14424	1.2518	1.12325		1.09614	1.09825	1.14374	1.11242	1.08365	1.11878	1.11135	1.10768	1.12498	1.14424	1.2518	1.12325				C3 - HLA-A2	99.21		24.1545		23.9246		1
C4 - HLA-DQ	TU169	0.09	542.32	22586.7	478.4	174.72	1069.12					1.19143													1.19143	0	0	0	0	0	0	0	0	0	0	0				C4 - HLA-DQ	0.09		0.764315		31.8325		0
C5 - HLA-DR	G46-6 (L243)	0.69	628.56	2748.07	551.2	188.03	1272.08					1.12571	1.11939	1.12596	1.11035										1.12571	1.11939	1.12596	1.11035	0	0	0	0	0	0	0	0				C5 - HLA-DR	0.69		0.885857		3.87298		0
C6 - HLA-DR,DP,DO	TU39	0.17	557.4	6235.32	497.12	179.87	1103.6																																	C6 - HLA-DR,DP,DO	0.17		0.785568		8.78771		0
C7 - Invariant NKT	6B11	0.18	568.34	2740.92	510.64	187.2	1186.85																																	C7 - Invariant NKT	0.18		0.784058		3.78126		0
C8 - Disialoganglioside GD2	14.G2a	0.53	613.92	2680.95	554.32	215.18	1229.59																																	C8 - Disialoganglioside GD2	0.53		0.865224		3.77838		0
C9 - MIC A/B	6D4	96.22	11343.1	11755.1	10156.6	3058.33	23326.3																																	C9 - MIC A/B	96.22		15.9864		16.5669		1
C10 - NKB1	M.AB.F11	1.84	909.37	18168.2	542.36	229.84	1225.22																																	C10 - NKB1	1.84		1.25453		25.0641		0
C11 - SSEA-1	MC480	7.78	1788.64	15613.4	574.08	221.36	8299.46																																	C11 - SSEA-1	7.78		2.62661		22.9281		1
C12 - SSEA-4	MC813-70	96.5	83604.9	86588.8	69847.4	3618.11	212440																																	C12 - SSEA-4	96.5		136.997		141.886		1
D1 - TRA-1-60	TRA-1-60	94.66	50284.6	53032	35911.2	2566.2	151834																																	D1 - TRA-1-60	94.66		73.8426		77.8771		1
D2 - TRA-1-81	TRA-1-81	91.57	45830.6	49914.8	27657.8	1680.85	155574																																	D2 - TRA-1-81	91.57		67.3019		73.2995		1
D3 - Vb 23	AHUT7	0.45	638.31	9244.56	550.16	211.02	1200.26																																	D3 - Vb 23	0.45		0.880585		12.7534		0
D4 - Vb 8	JR2	0.95	622.59	2324.87	560.56	185.07	1284.45																																	D4 - Vb 8	0.95		1.10125		4.11227		0
E1 - mIgM	G155-228		680.97		584.48	226.56	1351.27																																	E1 - mIgM			1
E2 - mIgG1	MOPC-21		724.87		573.04	225.42	1227.36																																	E2 - mIgG1			1
E3 - mIgG2a	G155-178		709.55		525.2	180.96	1153.41																																	E3 - mIgG2a			1
E4 - mIgG2b	27-35		565.35		522.08	182.99	1093.3																																	E4 - mIgG2b			1
E5 - mIgG3	J606		610.27		551.2	197.5	1270.88																																	E5 - mIgG3			1
F1 - CD49f	GoH3	99.47	48614.6	48867.4	40056.6	13907.5	109582																																	F1 - CD49f	99.47		56.5378		56.8318		1
F2 - CD104	439-9B	99.49	18962	19050.7	16228.2	6389.08	40508.9																																	F2 - CD104	99.49		29.4528		29.5905		1
F3 - CD120b	hTNFR-M1	0.52	611.46	2603.12	529.88	196.56	1298.13																																	F3 - CD120b	0.52		0.949752		4.0433		0
F4 - CD132	TUGh4	0.44	662.23	11306.9	561.6	213.04	1234.69																																	F4 - CD132	0.44		1.02861		17.5624		0
F5 - CD201	RCR-252	95.55	6215.56	6440.58	5451.68	2079.06	12105.5																																	F5 - CD201	95.55		8.33431		8.63603		1
F6 - CD210	3F9	0.26	654.53	2408.29	581.36	222.35	1303.48																																	F6 - CD210	0.26		0.761205		2.80079		0
F7 - CD212	2B6/12beta 2	0.09	630.76	2256.8	573.04	199.63	1295.16																																	F7 - CD212	0.09		0.733561		2.62461		0
F8 - CD267	1A1-K21-M22	0.35	616.71	7085	540.8	208	1162.77																																	F8 - CD267	0.35		0.717221		8.23971		0
F9 - CD294	BM16	1.42	730.09	10486.4	544.44	198.59	1262.56																																	F9 - CD294	1.42		0.84908		12.1955		0
F10 - CD326	EBA-1	50.61	2778.19	4159.61	2227.68	711.15	6589.54																																	F10 - CD326	50.61		3.23098		4.83754		1
F11 - Cutaneous Lymph. Antigen	HECA-452	6.31	1305.3	10918.6	609.44	239.15	2251.13																																	F11 - Cutaneous Lymph. Antigen	6.31		2.00874		16.8027		1
F12 - INT B7	FIB504	0.26	689.63	31958.2	548.08	213.2	1233.7																																	F12 - INT B7	0.26		0.802026		37.1667		0
G1 - SSEA-3	MC631	81.4	15492.9	18776.8	8594.56	791.39	51983.4																																	G1 - SSEA-3	81.4		23.8423		28.8958		1
H1 - rIgM	R4-22		649.81		586.56	235.98	1318.88																																	H1 - rIgM			1
H2 - rIgG1	R3-34		745.78		564.72	225.47	1244.93																																	H2 - rIgG1			1
H3 - rIgG2a	R35-95		859.86		559.52	227.6	1249.09																																	H3 - rIgG2a			1
H4 - rIgG2b	A95-1		643.81		588.64	226.67	1282.11																																	H4 - rIgG2b			1
